# Supplementary material for: Transplantation, Waitlist Status, and County Indices of Economic Health in West Virginia
Source: PubMed Central journal article supplement — Kidney360. 2023 Nov 17;5(1):73–9. doi: 10.34067/KID.0000000000000318 (PMC10833601; doi:10.34067/kid.0000000000000318), 2023-11-17

## Table of Contents

- Supplementary Table 1: County economic status designation
- Supplementary Table 2. Missing variables by waitlist and transplant status
- Supplementary Table 3. Economic Parameters for West Virginia and the United States
- Supplementary Figure 1. Poverty rate in WV counties
- Supplementary Figure 2. Transplant rate in WV counties
- Supplementary Figure 3. Waitlisting rate in WV counties

**Supplementary Table 1.** County economic status designation

Economic status of US counties is determined based on an index value. This index value is calculated based on poverty rate, per capita market income and three-year average unemployment rate. Distressed counties are defined as worst 10% of US counties. At-risk counties are the worst 10-25% of US counties.

<https://www.arc.gov/distressed-designation-and-county-economic-status-classification-system/>

**Supplementary Table 2.** Missing variables by waitlist and transplant status

| <b>Characteristics<sup>+</sup></b>                                                               | <b>Transplant<br/>(N=2,999)</b> | <b>Not<br/>transplanted<br/>(N=20,056)</b> | <b>Waitlisted<br/>(N=2,576)</b> | <b>Not<br/>Waitlisted<br/>(N=20,479)</b> |
|--------------------------------------------------------------------------------------------------|---------------------------------|--------------------------------------------|---------------------------------|------------------------------------------|
| <b>Age</b>                                                                                       | 0                               | 0                                          | 0                               | 0                                        |
| <b>Sex</b>                                                                                       | 0                               | 0                                          | 0                               | 0                                        |
| <b>BMI</b>                                                                                       | 845 (28.2%)                     | 4,058 (20.2%)                              | 527 (20.5%)                     | 4,376<br>(21.4%)                         |
| <b>Diabetes</b>                                                                                  | 0                               | 0                                          | 0                               | 0                                        |
| <b>Hypertension</b>                                                                              | 913 (30.4%)                     | 4,248 (21.2%)                              | 572 (22.2%)                     | 4,589<br>(22.4%)                         |
| <b>Institutionalized</b>                                                                         | 913 (30.4%)                     | 4,248 (21.2%)                              | 572 (22.2%)                     | 4,589<br>(22.4%)                         |
| <b>Compromised<br/>mobility</b>                                                                  | 913 (30.4%)                     | 4,248 (21.2%)                              | 572 (22.2%)                     | 4,589<br>(22.4%)                         |
| <b>COPD</b>                                                                                      | 913 (30.4%)                     | 4,248 (21.2%)                              | 572 (22.2%)                     | 4,589<br>(22.4%)                         |
| <b>CVA/TIA</b>                                                                                   | 913 (30.4%)                     | 4,248 (21.2%)                              | 572 (22.2%)                     | 4,589<br>(22.4%)                         |
| <b>CHF</b>                                                                                       | 913 (30.4%)                     | 4,248 (21.2%)                              | 572 (22.2%)                     | 4,589<br>(22.4%)                         |
| <b>Ischemic heart<br/>disease</b>                                                                | 1,387<br>(46.2%)                | 9,215 (21.2%)                              | 1,165<br>(45.2%)                | 9,437<br>(46.1%)                         |
| <b>Alcohol use</b>                                                                               | 913 (30.4%)                     | 4,248 (21.2%)                              | 572 (22.2%)                     | 4,589<br>(22.4%)                         |
| <b>Tobacco use</b>                                                                               | 913 (30.4%)                     | 4,248 (21.2%)                              | 572 (22.2%)                     | 4,589<br>(22.4%)                         |
| <b>PVD/history of<br/>amputation</b>                                                             | 913 (30.4%)                     | 4,248 (21.2%)                              | 572 (22.2%)                     | 4,589<br>(22.4%)                         |
| <b>Received<br/>nephrology care</b>                                                              | 1,706 (57%)                     | 10,486 (52.3%)                             | 1,290<br>(50.1%)                | 10,902<br>(53.2%)                        |
| <b>Year first KRT</b>                                                                            | 0                               | 0                                          | 0                               | 0                                        |
| <b>Patient not<br/>informed of<br/>transplant due<br/>to medical,<br/>psychiatric or<br/>age</b> | 0                               | 0                                          | 0                               | 0                                        |
| <b>Distressed or at<br/>risk counties</b>                                                        | 3 (0.1%)                        | 6 (0.01%)                                  | 2 (0.1%)                        | 7 (0.01%)                                |
| <b>Poverty rate</b>                                                                              | 3 (0.1%)                        | 6 (0.01%)                                  | 2 (0.1%)                        | 7 (0.01%)                                |

**Supplementary Table 3.** Economic Parameters for West Virginia and the United States

|               | Three-Year Average Unemployment Rate, 2018-2020 | Per Capita Market Income, 2020 | Poverty Rate, 2016-2020 | Three-Year Avg. Unemp. Rate, Percent of U.S., 2018-2020 | PCMI, Percent of U.S., 2020 | Poverty Rate, Percent of U.S., 2016-2020 |
|---------------|-------------------------------------------------|--------------------------------|-------------------------|---------------------------------------------------------|-----------------------------|------------------------------------------|
| West Virginia | 6.2                                             | 30,021                         | 17.1                    | 118.4                                                   | 64.4                        | 133.1                                    |
| United States | 5.2                                             | 46,638                         | 12.8                    | 100.0                                                   | 100.0                       | 100.0                                    |

1

1. Appalachian Regional Commission, Available at: <https://data.arc.gov/data>. Accessed July 11, 2023

Supplementary Figure 1. Poverty Rate in WV

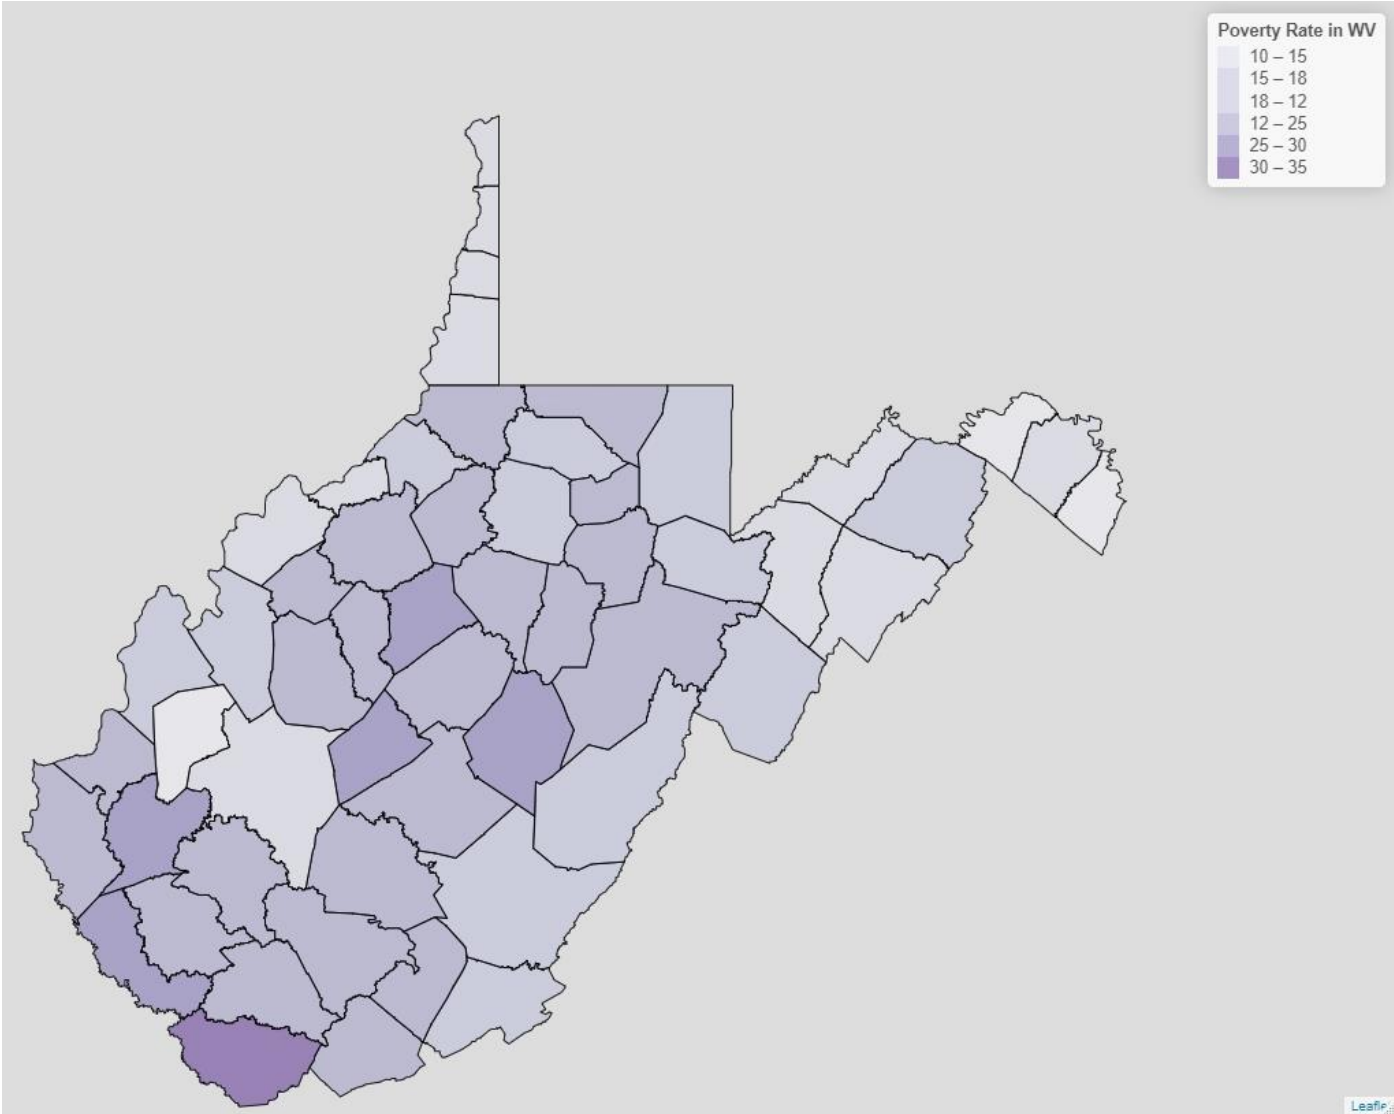

Supplementary Figure 2. Transplant Rate in WV

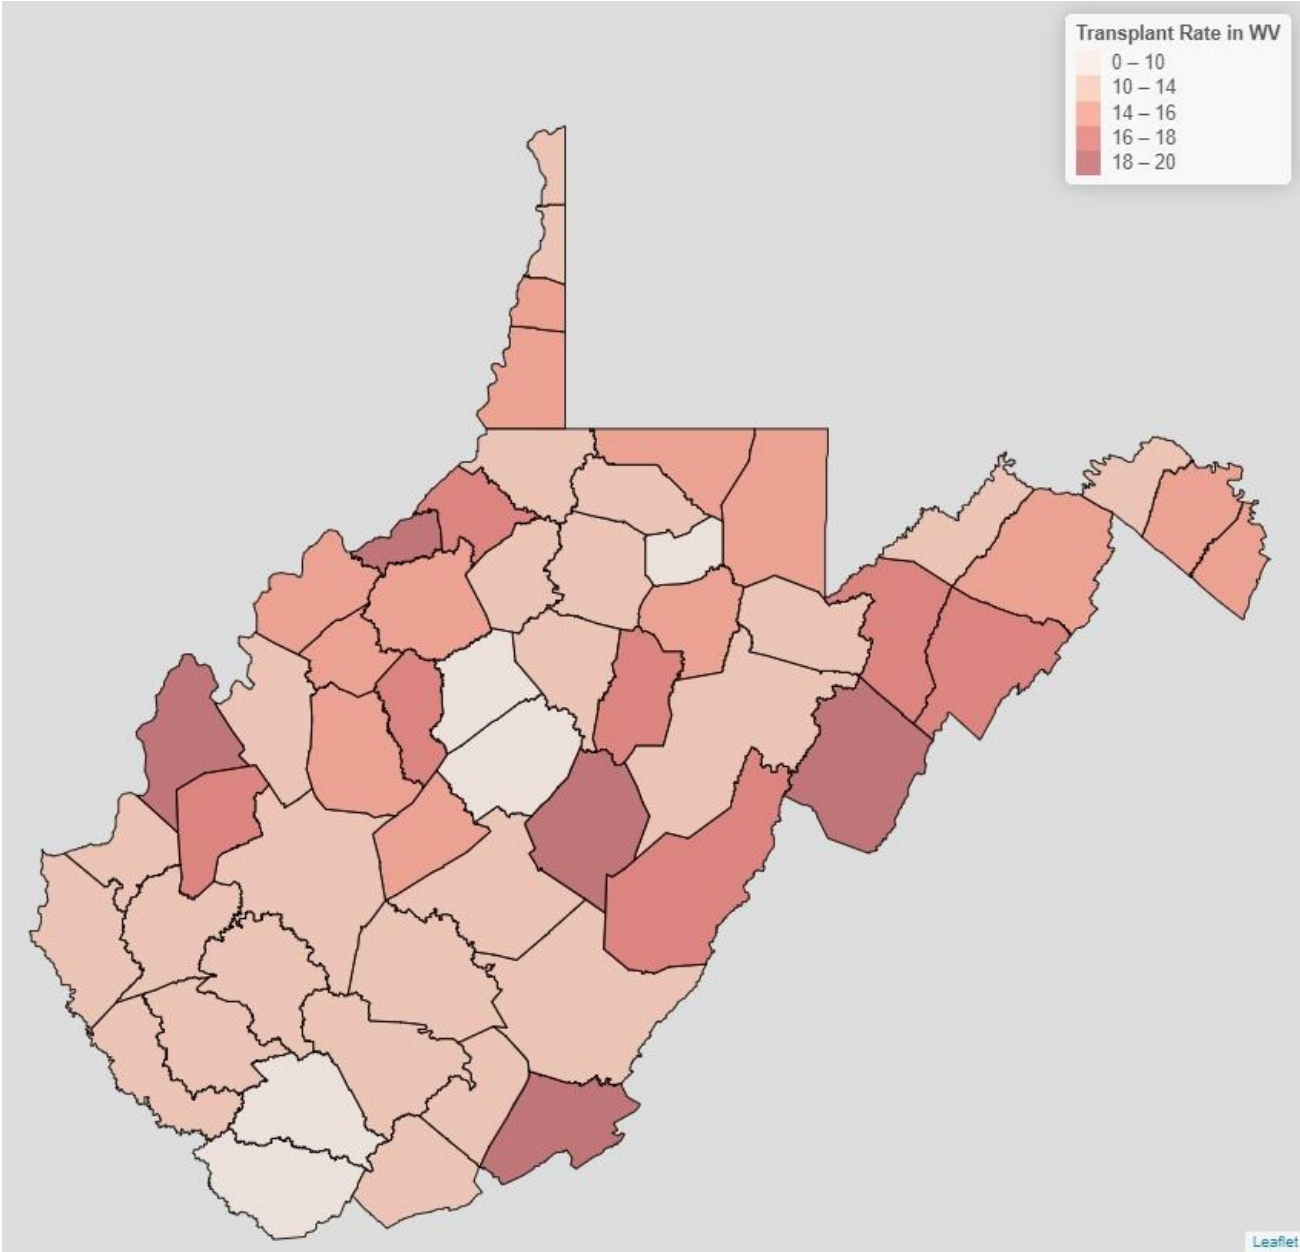

Supplementary Figure 3. Waitlist Rate in WV

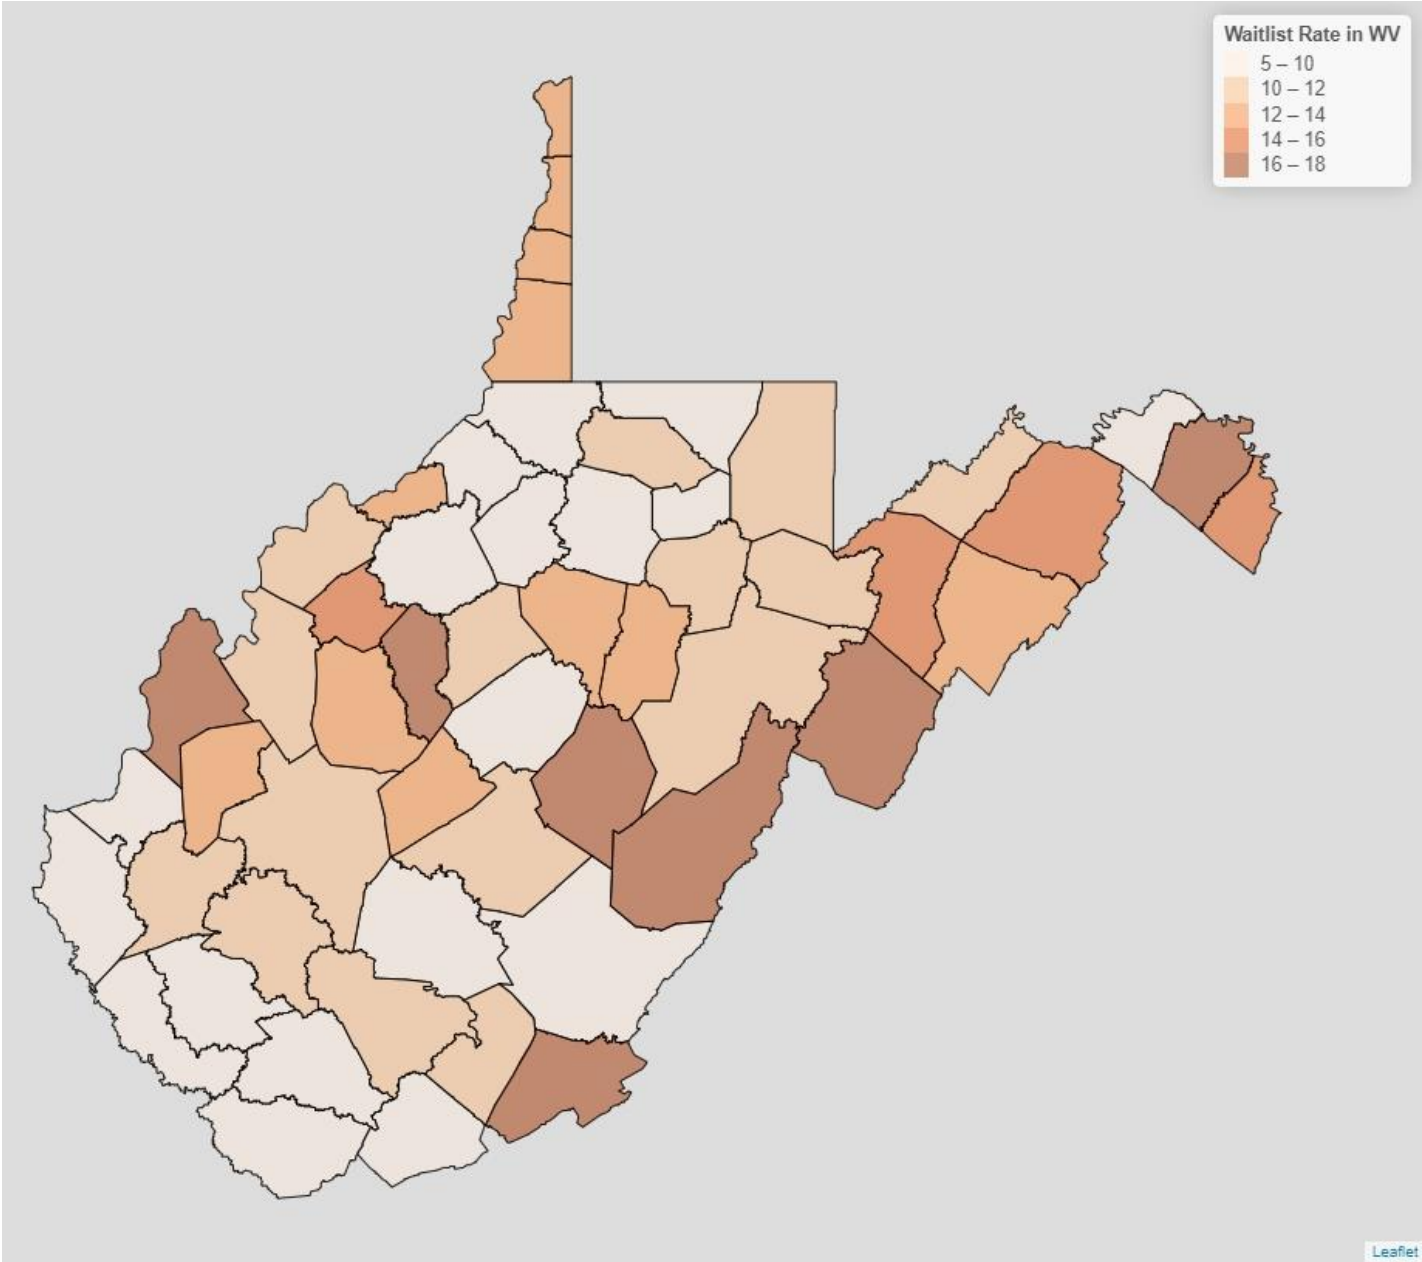

Supplement: kidney360-5-073-s001.pdf [file kidney360-5-073-s001.pdf]
